# Supplementary material
Source: Springer Nature journal article supplement (https://www.springermedizin.de/resource/supplementary/12974_2011_448_MOESM1_ESM.pdf/9601322)

Control Autistic

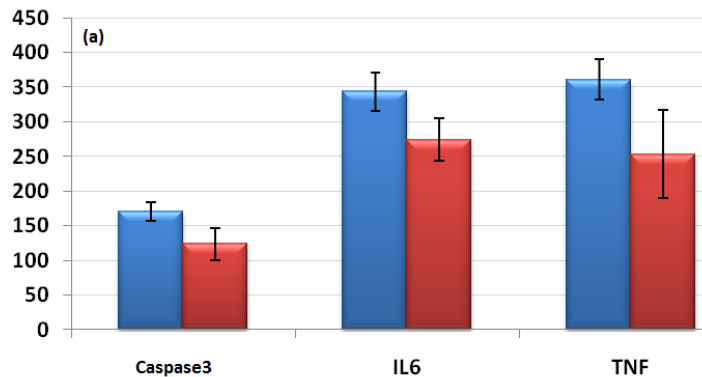

Control Autistic

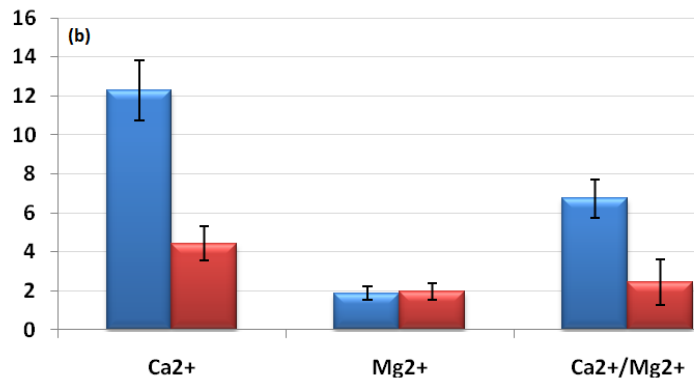

Control Autistic

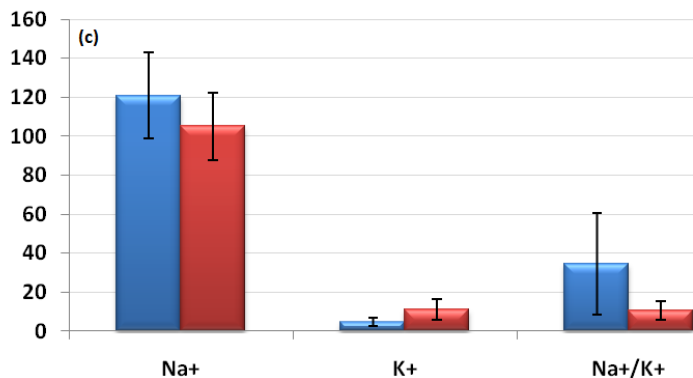

Supplement: MOESM1 [file 9601322]
